# Supplementary figures and images for: Mediating Effects of Trait Anxiety and State Anxiety on the Effects of Physical Activity on Depressive Symptoms
Source: MDPI journal article supplement (doi:10.3390/ijerph20075319), 2023-03-30

Supplementary Figure S1.  
Age<60 group

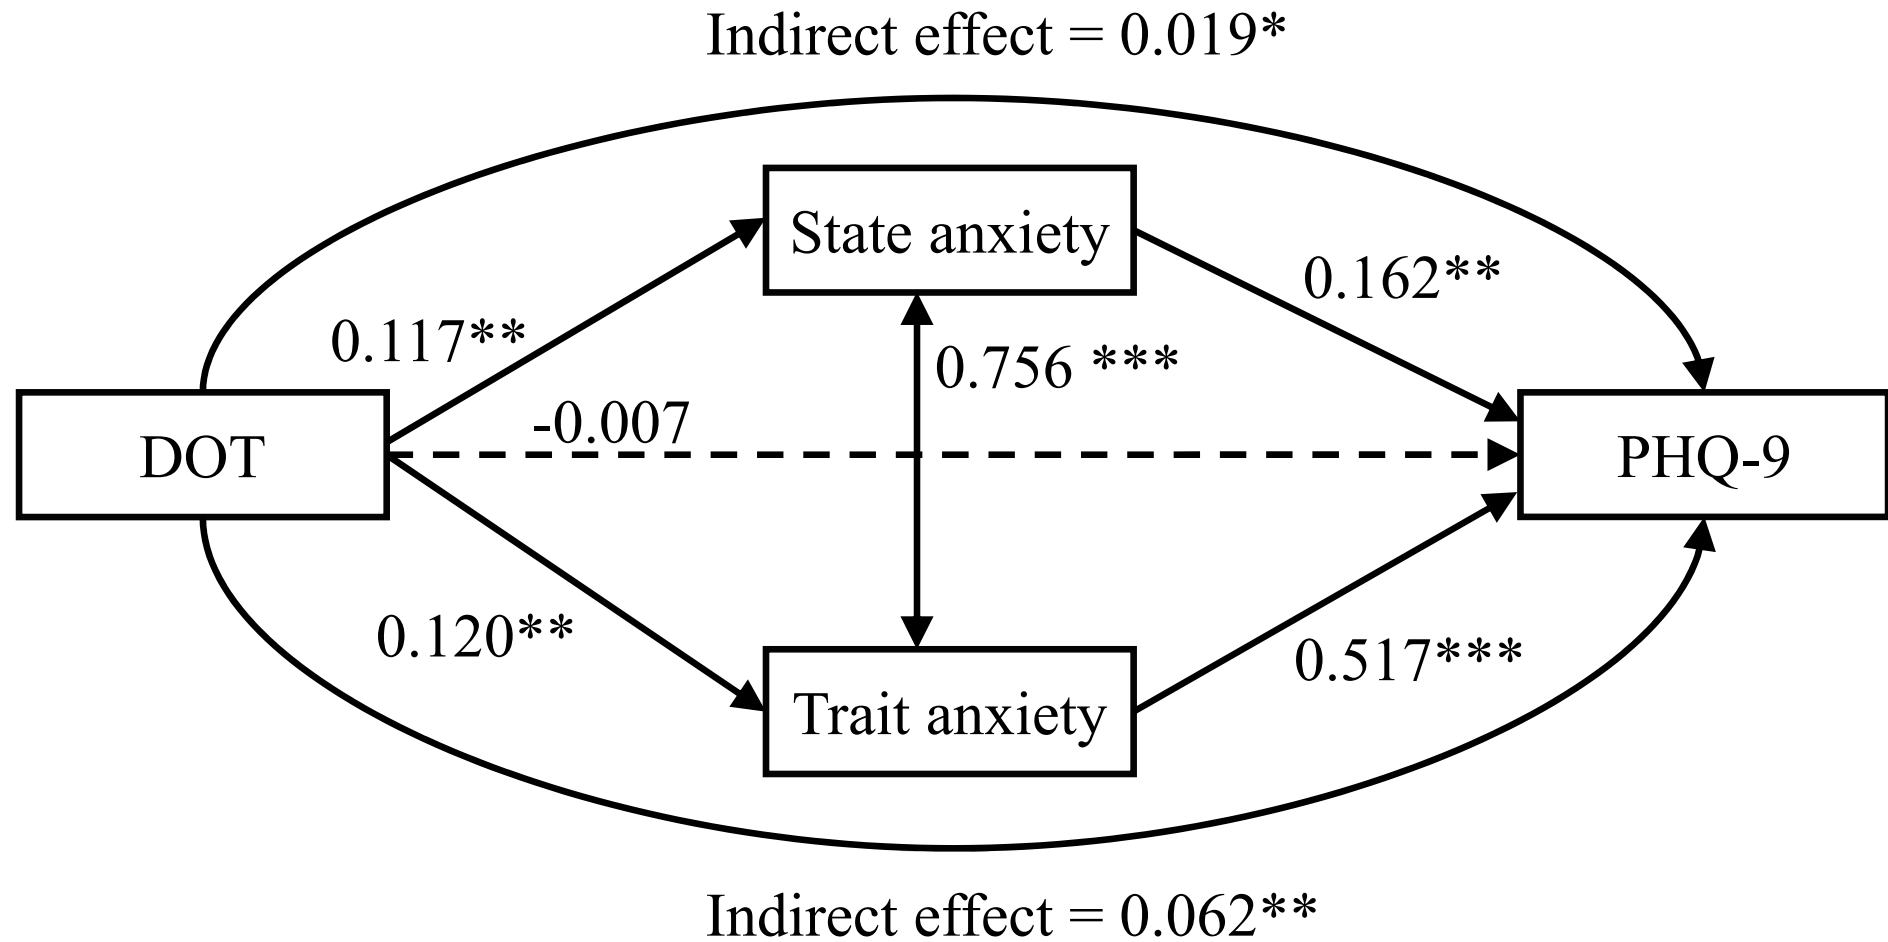

Supplementary Figure S2.  
Age $\geq$ 60 group

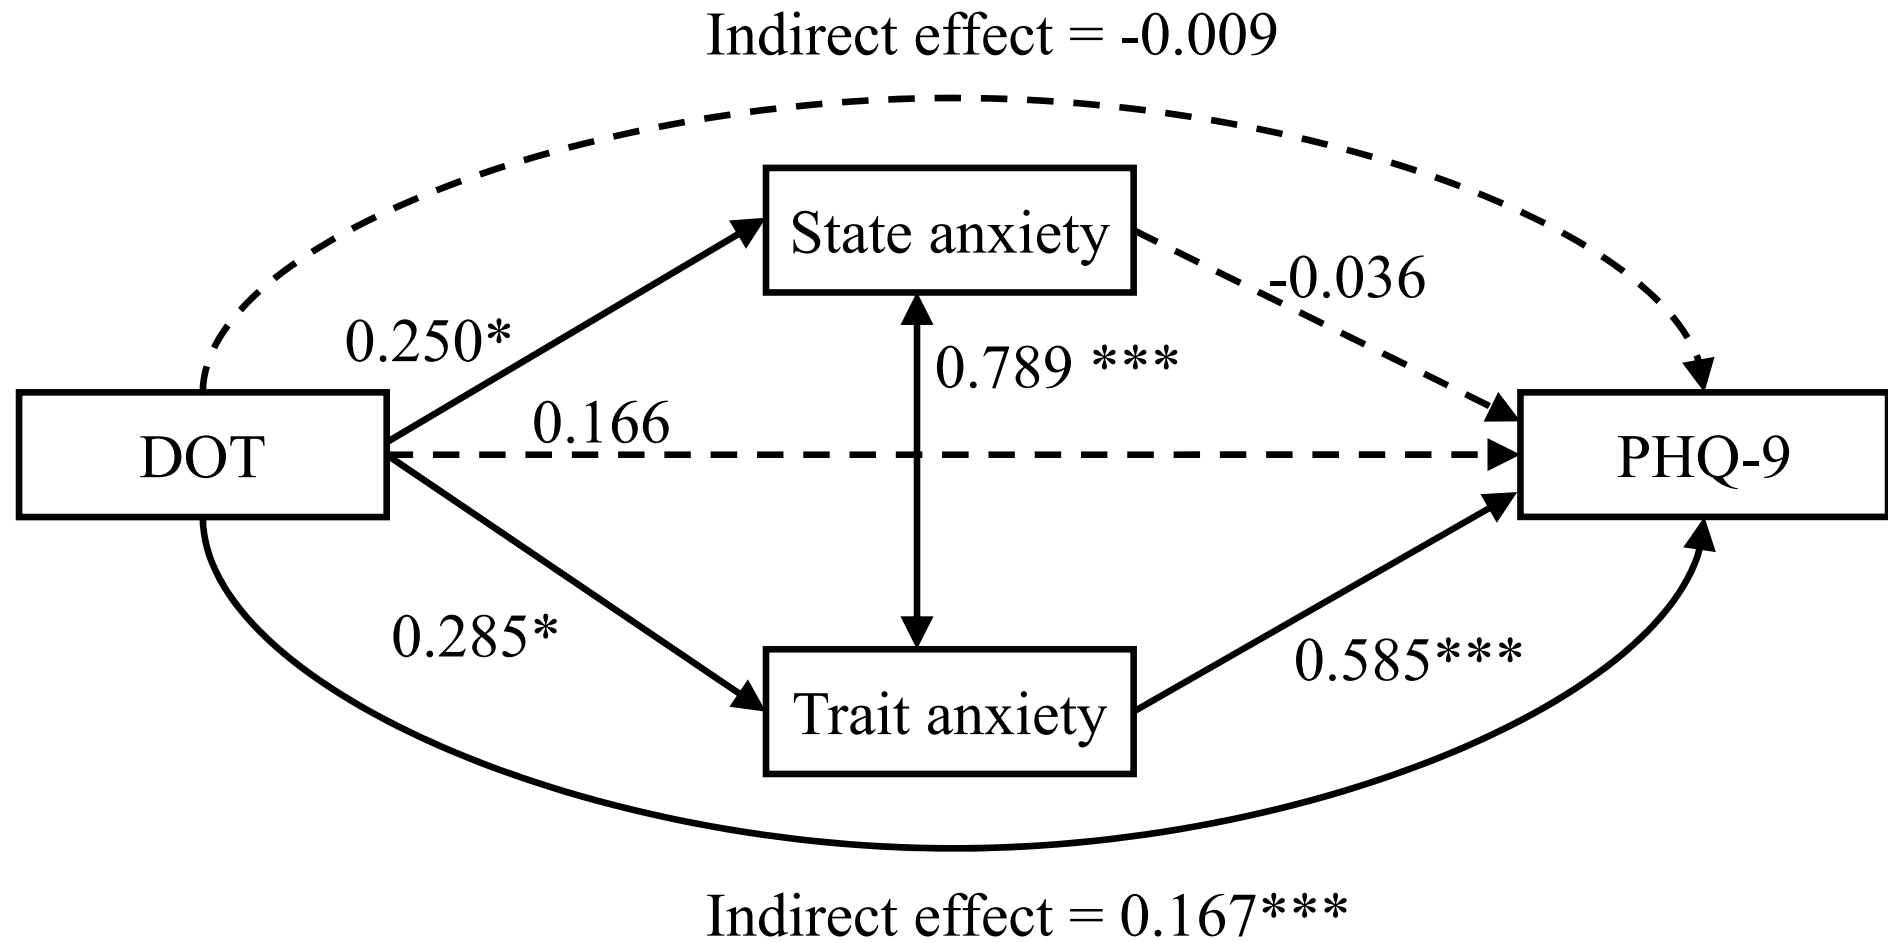

Supplement: s1 [file s1]
